1 **Title:**

2 **PARbars: cheap, easy to build ceptometers for continuous measurement of light interception**  
3 **in plant canopies**

4  
5 **Authors:**

6 William T. Salter, Andrew M. Merchant, Matthew E. Gilbert, Thomas N. Buckley

7  
8 William T. Salter

9 School of Life and Environmental Sciences, Sydney Institute of Agriculture,  
10 The University of Sydney,  
11 Brownlow Hill,  
12 NSW, Australia.  
13 william.salter@sydney.edu.au

14  
15 Andrew M. Merchant

16 School of Life and Environmental Sciences, Sydney Institute of Agriculture,  
17 The University of Sydney,  
18 Brownlow Hill,  
19 NSW, Australia.  
20 andrew.merchant@sydney.edu.au

21  
22 Matthew E. Gilbert

23 Department of Plant Sciences,  
24 University of California, Davis,  
25 Davis,  
26 CA, USA.  
27 megilbert@ucdavis.edu

28  
29 Thomas N. Buckley

30 Department of Plant Sciences,  
31 University of California, Davis,  
32 Davis,  
33 CA, USA.  
34 tnbuckley@ucdavis.edu

35  
36 **Corresponding author:** William T. Salter (william.salter@sydney.edu.au)

37  
38 **Keywords:**

39 Canopy, ceptometer, photosynthetically active radiation, plant area index, phenotyping,  
40 transmittance.

41  
42 **Short Abstract:**

43 Detailed instructions on how to build, calibrate and collect research quality data from PARbar  
44 ceptometers are presented.

45 **Long Abstract:**

46 Ceptometry is a technique used to measure the transmittance of photosynthetically active  
47 radiation through a plant canopy using multiple light sensors connected in parallel on a long  
48 bar. Ceptometry is often used to infer properties of canopy structure and light interception,  
49 notably leaf area index (LAI) and effective plant area index ( $PAI_{eff}$ ). Due to the high cost of  
50 commercially available ceptometers, the number of measurements that can be taken is often  
51 limited in space and time. This limits the usefulness of ceptometry for studying genetic  
52 variability in light interception, and precludes thorough analysis of, and correction for, biases  
53 that can skew measurements depending on the time of day. We developed continuously  
54 logging ceptometers (called PARbars) that can be produced for USD \$75 each and yield high  
55 quality data comparable to commercially available alternatives. Here we provide detailed  
56 instruction on how to build and calibrate PARbars, how to deploy them in the field and how to  
57 estimate PAI from collected transmittance data. We provide representative results from wheat  
58 canopies and discuss further considerations that should be made when using PARbars.

59

60 **Introduction:**

61 Ceptometers (linear arrays of light sensors) are used to measure the proportion of  
62 photosynthetically active radiation (PAR) intercepted by plant canopies. Ceptometers are used  
63 widely for agricultural crop research due to the relatively straightforward nature of  
64 measurements and simplicity of data interpretation. The basic principle of ceptometry is that  
65 transmittance of light to the base of a plant canopy ( $\tau$ ) is dependent on the projected area of  
66 light absorbing materials above. Measurements of PAR above and below the canopy can  
67 therefore be used to estimate canopy traits such as leaf area index (LAI) and effective plant  
68 area index ( $PAI_{eff}$ ) (which includes stems, culms and reproductive structures in addition to  
69 leaves)<sup>1-3</sup>. Reliability of  $PAI_{eff}$  estimates inferred from  $\tau$  is improved by modelling the effects of  
70 the beam fraction of incoming PAR ( $f_b$ ), the leaf absorptance ( $a$ ) and the effective canopy  
71 extinction coefficient ( $K$ );  $K$  in turn depends on both the solar zenith angle ( $\theta$ ) and the leaf angle  
72 distribution ( $\chi$ )<sup>1,4-6</sup>. It is common practice to correct for these effects. However, there are other  
73 biases that have not received due consideration in the past due to methodological and cost  
74 limitations.

75

76 We recently identified significant time-dependent bias in instantaneous ceptometry  
77 measurements of row crops, such as wheat and barley<sup>7</sup>. This bias is caused by an interaction  
78 between row planting orientation and solar zenith angle. To overcome this bias, continuously  
79 logging ceptometers can be mounted in the field to monitor diurnal cycles of canopy light  
80 interception and then daily averages of  $\tau$  and  $PAI_{eff}$  can be calculated. However, continuous  
81 measurements are often unfeasible due to the prohibitively high cost of commercially available  
82 ceptometers – often several thousand US dollars for a single instrument – and the requirement  
83 for measurements of many field plots. The latter is particularly evident in the ‘-omics’ era  
84 where many hundreds of genotypes are required for genomic analyses, such as genome wide  
85 association studies (GWAS) and genomic selection (GS) (for review see Huang & Han, 2014<sup>8</sup>).  
86 We recognised that there was a need for cost-effective ceptometers that could be produced in  
87 large numbers and be used for continuous measurements across many genotypes.

88

89 As a solution we designed easy-to-build, high-accuracy ceptometers (PARbars) at a cost of USD  
90 \$75 per unit. PARbars are built using 50 photodiodes that are sensitive only in the PAR  
91 waveband (wavelengths 390 – 700 nm), with very little sensitivity outside this range, negating  
92 the use of costly filters. The photodiodes are connected in parallel across a 1 m length to  
93 produce an integrated differential voltage signal that can be recorded with a datalogger. The  
94 circuitry is encased in epoxy for waterproofing and the sensors operate over a large  
95 temperature range (-40 to +80°C), allowing the PARbars to be deployed in the field for  
96 extended periods of time. With the exception of the photodiodes and a low-temperature-  
97 coefficient resistor, all parts required to build a PARbar can be purchased from a hardware  
98 store. A full list of required parts and tools is provided in Table 1. Here we present detailed  
99 instructions on how to build and use PARbars for estimation of  $PAI_{eff}$  and present  
100 representative results from wheat canopies.

101

## 102 **Protocol:**

### 103 **1. Building and calibrating the PARbars**

104 1.1) Gather all parts and tools required for assembly in a clean workspace. Note that PARbars  
105 can also be produced in batches due to long curing times required at certain points. Note that  
106 schematics of a PARbar can be found in Figure 1 for reference.

107

108 1.2) Drill a 4 mm diameter hole 20 mm from each end of an acrylic diffuser bar (1200 mm  
109 length x 30 mm width x 4.5 mm thickness; 445 – Opal White; Plastix Australia Pty. Ltd.,  
110 Arncliffe, NSW, Australia). Drill and tap threaded holes in a section of aluminium U-bar to  
111 secure diffuser, 20 mm from each end. Drill and tap threaded holes to suit mounting hardware  
112 (e.g., a tripod mounting plate).

113

114 1.3) Generally, bare copper wire comes on a roll and needs to be straightened before it can be  
115 used in the PARbar circuit. Secure one end of a 1.25 m length of wire (1.25 mm diameter) into a  
116 vice or clamp and tighten the other end into the grips of a hand drill. Turn on the drill to  
117 straighten the wire. Repeat with a second 1.25 m length of bare copper wire.

118

119 1.4) Mark the intended locations of the copper wire and the photodiodes along the edge of the  
120 diffuser using a fine-tip permanent marker (full schematics can be found in Figure 1).

121

122 1.5) Superglue one of the straightened copper wires to the diffuser. Super glue 50 photodiodes  
123 (EAALSDSY6444AO; Everlight Americas Inc., Carrollton, Texas) face-down along the diffuser at  
124 20 mm intervals, ensuring that they are in the centre of the diffuser and that all are arranged all  
125 in the same orientation such that the large tab sits on the copper wire. Super glue the other  
126 copper wire to the diffuser, such that it sits underneath the smaller tabs of the photodiodes.

127

128 1.6) Apply some solder flux to the photodiode tabs and solder the photodiodes to the copper  
129 wires. Test solder connections by shining a light onto each photodiode individually and checking  
130 for a voltage signal across the wires using a multimeter.

131

132 1.7) Solder a 1.5  $\Omega$  resistor in parallel across the copper wires, this will produce a linear  
133 quantum response (*this step is optional, if resistor is not soldered into the PARbar, it can instead*  
134 *be connected in parallel with the PARbar signal inputs on the datalogger*). Low temperature  
135 coefficient precision resistors should be used to prevent ambient temperature from influencing  
136 the voltage signal at a given light level.

137  
138 1.8) Solder the male end of a waterproof DC connector (ADA743; Core Electronics, Adamstown,  
139 NSW, Australia) to the ends of the copper wire and seal the connections using glue lined heat  
140 shrink tubing.

141  
142 1.9) Using silicone sealant, create a continuous silicone barrier around the circuitry to form a  
143 fluid-tight well. Once the sealant has cured, fill the well with epoxy resin (651 – Universal Epoxy  
144 Potting Resin; Solid Solutions, East Bentleigh, VIC, Australia).

145  
146 1.10) When the epoxy resin has hardened (overnight), remove the silicone sealant using a razor  
147 blade. Bolt the diffuser to the pre-threaded aluminium U-bar using M4 bolts.

148  
149 1.11) Use masking tape to secure the diffuser to the aluminium along its whole length and fill  
150 the space inside the ceptometer with polyurethane foam filler. Once the foam filler has set  
151 (overnight), remove the masking tape. The ceptometer is now complete.

152  
153 1.12) Solder the female end of the DC connector to a length of two-conductor cable, which will  
154 be connected to the datalogger, and seal the connections with glue lined heat shrink.

155  
156 1.13) The PARbar should be calibrated against a quantum sensor (such as LI-190R; LI-COR,  
157 Lincoln, Nebraska, USA). Connect both sensors to a datalogger (such as CR5000; Campbell  
158 Scientific, Logan, Utah, USA) and set them outside in full sun on a level plane (level with a spirit  
159 level or spirit bubble). Log the outputs of both sensors for a full diurnal cycle. Plot a calibration  
160 curve (such as Figure 2) to convert the raw voltage signal from the PARbars to PAR using the  
161 quantum sensor output.

## 162 163 **2. Installation in the field**

164 2.1) To infer  $PAI_{\text{eff}}$ , one PARbar (or quantum sensor) should be set up above the canopy with  
165 the other PARbars inserted below the canopy at a 45° angle to row planting. The PARbar above  
166 the canopy can be mounted on a tripod. All PARbars should be levelled using a spirit level or  
167 bubble. It is strongly encouraged that data is sampled across a full diurnal cycle due to time  
168 dependent bias of instantaneous measurements<sup>7</sup>.

169  
170 2.2) Connect the PARbars to a datalogger using cables made in step 1.11 and commence logging  
171 at desired sampling interval. Remember to connect each in parallel with a 1.5  $\Omega$  low  
172 temperature coefficient precision shunt resistor if this was not integrated into the PARbar  
173 design.

174

175 2.3) Collect data from the datalogger and transfer to a computer. Differential voltage data can  
176 be converted to PAR using the calibration for each PARbar.

177

### 178 3. Calculation of effective plant area index (PAI<sub>eff</sub>)

179 3.1) PAI<sub>eff</sub> can be calculated for each time point in the dataset using the following equations  
180 (provided in the manual for the AccuPAR LP-80 ceptometer; Decagon Inc., Pullman, WA, USA<sup>6</sup>):

181

$$182 \quad (1) \quad \text{PAI} = \frac{(1-1/2K)f_b-1}{A(1-0.47f_b)} \ln \tau ,$$

183

184 where  $A = 0.283 + 0.0785a - 0.159a^2$  (in which  $a$  is leaf absorbance),  $\tau$  is the ratio of below- to  
185 above-canopy PAR, and  $K$  and  $f_b$  are modelled by Equation 2<sup>4</sup> and Equation 3<sup>9</sup>, respectively:

186

$$187 \quad (2) \quad K = \frac{(\chi^2 + \tan^2 \theta)^{0.5}}{\chi + 1.744(\chi + 1.182)^{-0.733}} ,$$

188

189 where  $\chi$  is a dimensionless parameter describing leaf angle distribution,  $\theta$  is the solar zenith  
190 angle, and

191

$$192 \quad (3) \quad f_b = 1.395 + r \left( -14.43 + r \left( 48.57 + r \left( -59.024 + 24.835 \cdot r \right) \right) \right) ,$$

193

194 where  $r$  is PAR above the canopy (PAR<sub>above</sub>) as a fraction of its maximum possible value  
195 (PAR<sub>above,max</sub> = 2550 · cos  $\theta$ ); i.e.  $r = \text{PAR}_{\text{above}} / \text{PAR}_{\text{above,max}}$ . For wheat we assumed  $a = 0.9$  and  $\chi =$   
196 0.96 (the latter value was given for wheat by Campbell and van Evert (1994)<sup>10</sup>). An R script is  
197 provided as a supplementary file for automated processing of large datasets.

198

### 199 Representative results:

200 A representative calibration curve for a PARbar is shown in Figure 2. The differential voltage  
201 output of a PARbar is linearly proportional to the PAR output from a quantum sensor, with  $R^2 =$   
202 0.9998. PARbars were deployed in wheat canopies and logged every 20 s across the  
203 development of the plants. A typical diurnal timecourse of the canopy light environment  
204 collected using a PARbar on a clear sunny day is shown in Figure 3 (raw transmittance data and  
205 corrected PAI are shown for comparison). Figures 3b and 3c demonstrate the bias that could be  
206 introduced by taking instantaneous ceptometer measurements at various times of day (as per  
207 Salter *et al.* 2018<sup>7</sup>). The wheat plots used for the collection of this data had a row planting  
208 orientation due north-south with transmission of light to the lower canopy peaking at 12:30  
209 (Figure 3b). If an instantaneous measurement were to be taken at this point, PAI would be  
210 underestimated whilst if it was taken in the morning or afternoon it may be overestimated. The  
211 weatherproof PARbars can also be deployed in the field for longer time periods; Figure 4  
212 demonstrates how the PARbars could be used to monitor how canopy light environment  
213 changes as the plants develop.

214

215 **Table 1.** Components and tools required to build a PARbar ceptometer. Note that the  
216 photodiode is a specific component, and it is essential that it is used due to its spectral

217 response. All other parts can be obtained from hardware and electronics suppliers, and suitable  
218 alternatives to the part numbers stated could be used.

219

220 **Figure 1.** Schematics for the PARbar build. (a) highlights the location and arrangement of the  
221 waterproof connector and the internal shunt resistor; (b) highlights the arrangement and  
222 spacing of the photodiodes; (c) highlights the drilling locations on the acrylic diffuser bar; (d)  
223 highlights the drilling locations on the aluminium U-bar; and (e) shows an electronic circuit  
224 diagram of a PARbar.

225

226 **Figure 2.** A representative PARbar calibration curve, showing the relationship between the  
227 differential voltage output of a PARbar and the photosynthetic photon flux density from a LI-  
228 COR LI-190R quantum sensor.

229

230 **Figure 3.** Representative daily timecourse data collected on a clear day using PARbars in wheat  
231 canopies at anthesis in Canberra, Australia ( $-35^{\circ}12'00.1008''$ ,  $149^{\circ}05'17.0988''$ ). (a) shows the  
232 PAR measured above the canopy, (b) the uncorrected transmittance data (i.e.  
233  $PAR_{above}/PAR_{below}$ ), and (c) the effective plant area index ( $PAI_{eff}$ ), corrected for the beam fraction  
234 of incoming PAR ( $f_b$ ), the leaf absorptance ( $a$ ) and canopy extinction coefficient ( $K$ ). Data points  
235 shown in (b) and (c) are means ( $n = 30$ ), solid lines are LOESS local regressions fitted in R ( $\alpha =$   
236  $0.5$ ), shaded areas are standard errors of the fit and the dashed horizontal lines represent the  
237 daily means. The shaded area between the dotted lines is the time window (1100 – 1400h)  
238 recommended for instantaneous ceptometer measurements in wheat by CIMMYT<sup>11</sup>.

239

240 **Figure 4.** Representative data collected across a growing season (from early tillering to  
241 anthesis) using PARbars deployed in wheat canopies in Canberra, Australia ( $-35^{\circ}12'00.1008''$ ,  
242  $149^{\circ}05'17.0988''$ ). (a) shows the uncorrected transmittance data and (b) the effective plant  
243 area index, corrected for the beam fraction of incoming PAR ( $f_b$ ), the leaf absorptance ( $a$ ) and  
244 canopy extinction coefficient ( $K$ ). Data points shown represent daily means for the period 1000  
245 – 1400h ( $n = 30$ ). Solid lines are LOESS local regressions fitted in R ( $\alpha = 0.75$ ), shaded areas are  
246 standard errors of the fit. Raw data was not included in further analysis if  $PAR_{above}$  was  $< 1500$   
247  $\mu\text{mol m}^{-2} \text{s}^{-1}$  and if  $PAR_{below}/PAR_{above}$  was  $> 1$ .

248

#### 249 **Discussion:**

250 The quality of data collected with PARbars make them an alternative to expensive commercial  
251 ceptometers, yielding an  $R^2 > 0.99$  when calibrated against a LI-COR Li-190R quantum sensor  
252 (Figure 2). Similar high correlations were found for 68 PARbars used in previous work<sup>7</sup>. As with  
253 most commercial light sensors, calibrations differ among PARbars so their output must be  
254 converted using their specific individual calibrations. Recently, there has been a growing  
255 interest in novel high-throughput plant phenotyping technologies for the estimation of canopy  
256 traits (for review see Yang *et al.*, 2017<sup>12</sup>). Whilst these methods are promising in that they  
257 produce huge amounts of data they are typically very indirect and require validation against  
258 conventional techniques. PARbars could serve as a cost-effective, ground-based validation tool  
259 for these new techniques.

260

261 Our previous work<sup>7</sup> highlighted that continuous ceptometry measurements across diurnal  
262 cycles are required for reliable estimation of PAI of row crop canopies, due to interactions  
263 between solar zenith and row-planting orientation that could bias instantaneous  
264 measurements. This can also be seen in Figure 3. The low production cost of PARbars make  
265 them a viable option for continuous measurements in the field. With sufficient numbers of  
266 PARbars, continuous measurements can be performed in all field plots. Alternatively, PARbars  
267 can provide continuous measurements in just a few plots in order to characterize row-  
268 orientation biases to develop time-specific correction functions for instantaneous  
269 measurements (for more information see Salter et al. 2018<sup>7</sup>). Another key benefit of using  
270 continuous ceptometry is the ability to capture short fluctuations in  $\tau$  over time (sunflecks and  
271 shade flecks), caused by clouds passing overhead, movement of the canopy, etc. Photosynthesis  
272 is known to be highly sensitive to small changes in environmental conditions and ‘dynamic’  
273 changes in photosynthesis are now thought to be important in driving crop yield (for review see  
274 Murchie *et al.*, 2018<sup>13</sup>). PARbars installed in the field with a suitably short logging interval could  
275 be used to capture these short fluctuations and provide better understanding of the dynamic  
276 nature of plant canopies.

277  
278 PARbars can also be installed in the field for extended periods of time, as shown in the example  
279 in Figure 4. One notable exclusion from the current PARbar design that could be considered for  
280 long-term monitoring is a means to distinguish between direct beam and diffuse components of  
281 incoming PAR above the canopy. As diffuse radiation penetrates deeper into the canopy than  
282 direct sunlight<sup>14</sup>, transmittance will be increased and  $PAI_{eff}$  will be underestimated. When all  
283 radiation is diffuse, PAI is directly proportional to the logarithm of  $1/\tau$  rather than the  
284 relationship shown in Equation 1<sup>15</sup>. The lack of a diffuse component in the data processing  
285 steps used in this study may explain some of the day-to-day variation in the data shown in  
286 Figure 4. It is possible to find diffuse/direct radiation data in some open access datasets but due  
287 to the localised nature of environmental variables that influence incoming PAR (clouds, air  
288 pollution, etc.) they are often not applicable to ceptometry data. Cruse *et al.* (2015)<sup>16</sup> noted  
289 that currently available commercial instruments that can measure direct and diffuse PAR are  
290 expensive and require regular maintenance, so they designed a simple and cheap apparatus to  
291 address this issue. Their system consists of a quantum sensor that is routinely shaded by a  
292 motorised, moving shadowband and allows for continuous measurement of total, direct and  
293 diffuse PAR. The sensor used in the Cruse *et al.*<sup>16</sup> system could be replaced with the same  
294 photodiode used in PARbars to further reduce cost, and may be easily incorporated into the  
295 existing PARbar setup. These measurements could be integrated into the data processing  
296 pipeline and would further enhance reliability of estimates of  $PAI_{eff}$ .

297  
298 The PARbars that we present in this paper were designed specifically for use in row crops, such  
299 as wheat and barley, but the handmade design could easily be modified for a user’s specific  
300 requirements. For example, the shunt resistor could be changed to provide linearity at lower  
301 PAR ranges, or for versatility a low-temperature coefficient precision potentiometer could be  
302 used to change the linear range as necessary. The photodiodes could also be used individually  
303 as quantum sensors, allowing the user to capture spatial as well as temporal variation within  
304 individual canopies for a much lower cost than would have been possible previously. This could

305 be of particular importance given the growing focus on dynamic photosynthesis under  
306 fluctuating light conditions.

307  
308 Although we used a conventional (and expensive) datalogger for the data presented in this  
309 study, there is scope for dataloggers to also be built using off-the-shelf componentry, enabling  
310 the creation of a combined ceptomety and datalogger system on a limited budget. The  
311 popularity of so-called 'maker' platforms, such as Arduino and Raspberry Pi, offer great promise  
312 in this area and one might consider the use of the open-source Arduino-based Cave Pearl  
313 project<sup>17</sup> as a starter for further development. The Cave Pearl dataloggers were designed for  
314 environmental monitoring of cave ecosystems so ruggedness and low power demand were key  
315 considerations in their design. Similar considerations are relevant for implementation to plant  
316 phenotyping work. The cost of the components required for the Cave Pearl datalogger is less  
317 than USD \$50 per unit and due to the small size of the circuit boards used in this project,  
318 datalogging could be directly incorporated into future design of PARbars.

319  
320 PARbars provide a cost-effective and high-accuracy alternative to commercially available  
321 ceptometers. They do not require specialist expertise to build, nor for the interpretation of  
322 resulting data. Consequently, PARbars could be widely adopted in the plant phenotyping  
323 community – including by those who generally use expensive light sensing tools and those who  
324 have been unable to access such technology due to budget restrictions. The 'do-it-yourself'  
325 nature of PARbars means that they could be adapted to a user's specific needs with added  
326 flexibility for future development and adaptation of this technology for a range of purposes.

327

### 328 **Acknowledgements:**

329 The authors would like to thank Dr. Richard Richards and Dr. Shek Hossain at CSIRO, Agriculture  
330 and Food for access to and management of the field plots used for this research. This research  
331 was supported by the International Wheat Yield Partnership, through a grant provided by the  
332 Grains Research and Development Corporation (US00082). TNB was supported by the  
333 Australian Research Council (DP150103863 and LP130100183) and the National Science  
334 Foundation (Award #1557906). This work was supported by the USDA National Institute of Food  
335 and Agriculture, Hatch project 1016439.

336

### 337 **Disclosures:**

338 The authors confirm that they have no conflicts of interest and nothing to disclose.

339

### 340 **References:**

- 341 1 Armbrust, D. V. Rapid measurement of crop canopy cover. *Agronomy Journal*. **82** (6),  
342 1170-1171, doi:10.2134/agronj1990.00021962008200060030x, (1990).
- 343 2 Breda, N. J. J. Ground-based measurements of leaf area index: a review of methods,  
344 instruments and current controversies. *Journal of Experimental Botany*. **54** (392), 2403-  
345 2417, doi:10.1093/jxb/erg263, (2003).
- 346 3 Francone, C., Pagani, V., Foi, M., Cappelli, G. & Confalonieri, R. Comparison of leaf area  
347 index estimates by ceptometer and PocketLAI smart app in canopies with different  
348 structures. *Field Crops Research*. **155** 38-41, doi:10.1016/j.fcr.2013.09.024, (2014).



- 349 4 Campbell, G. S. Extinction coefficients for radiation in plant canopies calculated using an  
350 ellipsoidal inclination angle distribution. *Agricultural and Forest Meteorology*. **36** (4),  
351 317-321, doi:10.1016/0168-1923(86)90010-9, (1986).
- 352 5 Cohen, S., Rao, R. S. & Cohen, Y. Canopy transmittance inversion using a line quantum  
353 probe for a row crop. *Agricultural and Forest Meteorology*. **86** (3-4), 225-234,  
354 doi:10.1016/s0168-1923(96)02426-4, (1997).
- 355 6 Decagon Devices. *AccuPAR PAR/LAI Ceptometer Model LP-80 Operator's Manual*.  
356 (Decagon Devices, Inc., 2017).
- 357 7 Salter, W. T., Gilbert, M. E. & Buckley, T. N. Time-dependent bias in instantaneous  
358 ceptometry caused by row orientation. *The Plant Phenome Journal*.  
359 doi:10.2135/tppj2018.07.0004, (In press).
- 360 8 Huang, X. H. & Han, B. in *Annual Review of Plant Biology, Vol 65* Vol. 65 *Annual Review*  
361 *of Plant Biology* (ed S. S. Merchant) 531-551 (Annual Reviews, 2014).
- 362 9 Decagon Devices. *Application Note: Beam fraction calculation in the LP80*. (Decagon  
363 Devices, Inc., 2009).
- 364 10 Campbell, G. S. & Van Evert, F. K. *Light interception by plant canopies - efficiency and*  
365 *architecture*. (Nottingham University Press, 1994).
- 366 11 Pask, A., Pietragalla, J., Mullan, D. & Reynolds, M. *Physiological breeding II: a field guide*  
367 *to wheat phenotyping*. (CIMMYT, 2012).
- 368 12 Yang, G. J. *et al.* Unmanned aerial vehicle remote sensing for field-based crop  
369 phenotyping: current status and perspectives. *Frontiers in Plant Science*. **8** 26,  
370 doi:10.3389/fpls.2017.01111, (2017).
- 371 13 Murchie, E. H. *et al.* Measuring the dynamic photosynthome. *Annals of botany*. **122** (2),  
372 207-220, doi:10.1093/aob/mcy087, (2018).
- 373 14 Li, T. *et al.* Enhancement of crop photosynthesis by diffuse light: quantifying the  
374 contributing factors. *Annals of Botany*. **114** (1), 145-156, doi:10.1093/aob/mcu071,  
375 (2014).
- 376 15 Lang, A. R. G. & Yueqin, X. Estimation of leaf-area index from transmission of direct  
377 sunlight in discontinuous canopies. *Agricultural and Forest Meteorology*. **37** (3), 229-  
378 243, doi:10.1016/0168-1923(86)90033-x, (1986).
- 379 16 Cruse, M. J., Kucharik, C. J. & Norman, J. M. Using a simple apparatus to measure direct  
380 and diffuse photosynthetically active radiation at remote locations. *Plos One*. **10** (2), 19,  
381 doi:10.1371/journal.pone.0115633, (2015).
- 382 17 Beddows, P. A. & Mallon, E. K. Cave Pearl Data Logger: a flexible Arduino-based logging  
383 platform for long-term monitoring in harsh environments. *Sensors*. **18** (2), 26,  
384 doi:10.3390/s18020530, (2018).
- 385

386 **Tables:**  
387 **Table 1**

| <b>Specifics - essential that this part is used due to the spectral response of this sensor</b> |               |                                                                                                                                |                                                      |                                                             |
|-------------------------------------------------------------------------------------------------|---------------|--------------------------------------------------------------------------------------------------------------------------------|------------------------------------------------------|-------------------------------------------------------------|
| <b>Component</b>                                                                                | <b>Number</b> | <b>Information</b>                                                                                                             | <b>Part number</b>                                   | <b>Link</b>                                                 |
| Photodiode                                                                                      | 50            | It is important that this specific component is used due to spectral response.                                                 | Everlight Americas, EAALSDSY6444A                    | <a href="https://bit.ly/2FzVnuH">https://bit.ly/2FzVnuH</a> |
| <b>Generic - alternative parts could be used here</b>                                           |               |                                                                                                                                |                                                      |                                                             |
| <b>Component</b>                                                                                | <b>Number</b> | <b>Information</b>                                                                                                             | <b>Part number</b>                                   | <b>Link</b>                                                 |
| 1.5 Ω precision resistor                                                                        | 1             | Could be made using multiple larger resistors in parallel but they need to have low temperature coefficient (i.e. ± 3 ppm/°C). | TE Connectivity, UPW25 series                        | <a href="https://bit.ly/2DFuPpm">https://bit.ly/2DFuPpm</a> |
| Acrylic diffuser bar                                                                            | 1             | 1200 mm length x 30 mm width x 4.5 mm thick                                                                                    | Plastix, 445 - Opal White                            | <a href="https://bit.ly/2Bq0fyc">https://bit.ly/2Bq0fyc</a> |
| Waterproof connectors                                                                           | 1             | 2-conductor waterproof connector. DC power connectors work well.                                                               | Core Electronics, ADA743                             | <a href="https://bit.ly/2Brcrik">https://bit.ly/2Brcrik</a> |
| Clear epoxy potting resin                                                                       |               | Clear epoxy resin for electrical applications                                                                                  | Solid Solutions, 651 - Universal Epoxy Potting Resin | <a href="https://bit.ly/2qYOpHa">https://bit.ly/2qYOpHa</a> |
| Aluminium U-bar                                                                                 | 1             | 1220 mm length x 35 mm width x 25 mm depth                                                                                     | Capral, EK9160                                       | <a href="https://bit.ly/2PPfJou">https://bit.ly/2PPfJou</a> |
| Bare solid core copper wire                                                                     | 2             | 1 m lengths; 1.15 mm thickness. Straightened by securing one end in a vice and the other in a drill.                           |                                                      |                                                             |
| Bolts                                                                                           | 2             | 30 mm M4                                                                                                                       |                                                      |                                                             |
| Two-conductor cable                                                                             |               | Heavy duty as the PARbars will be used outdoors.                                                                               |                                                      |                                                             |
| Glue lined heat shrink                                                                          |               | Various sizes                                                                                                                  |                                                      |                                                             |
| Solder and flux                                                                                 |               | Any suitable                                                                                                                   |                                                      |                                                             |
| Super glue                                                                                      |               | Low viscosity formulations preferred                                                                                           |                                                      |                                                             |
| Foam filler                                                                                     |               | Any suitable                                                                                                                   |                                                      |                                                             |
| <b>Tools and other consumables required</b>                                                     |               |                                                                                                                                |                                                      |                                                             |
| Soldering iron                                                                                  |               | Clamps                                                                                                                         |                                                      |                                                             |
| Heat gun                                                                                        |               | LED torch                                                                                                                      |                                                      |                                                             |
| Drill (or drill press)                                                                          |               | Voltmeter                                                                                                                      |                                                      |                                                             |
| Tap and die set                                                                                 |               | Masking tape                                                                                                                   |                                                      |                                                             |
| Screwdriver                                                                                     |               | Silicone sealant                                                                                                               |                                                      |                                                             |
| Spirit level/bubble                                                                             |               |                                                                                                                                |                                                      |                                                             |

389 **Figures:**  
390 **Figure 1**  
391

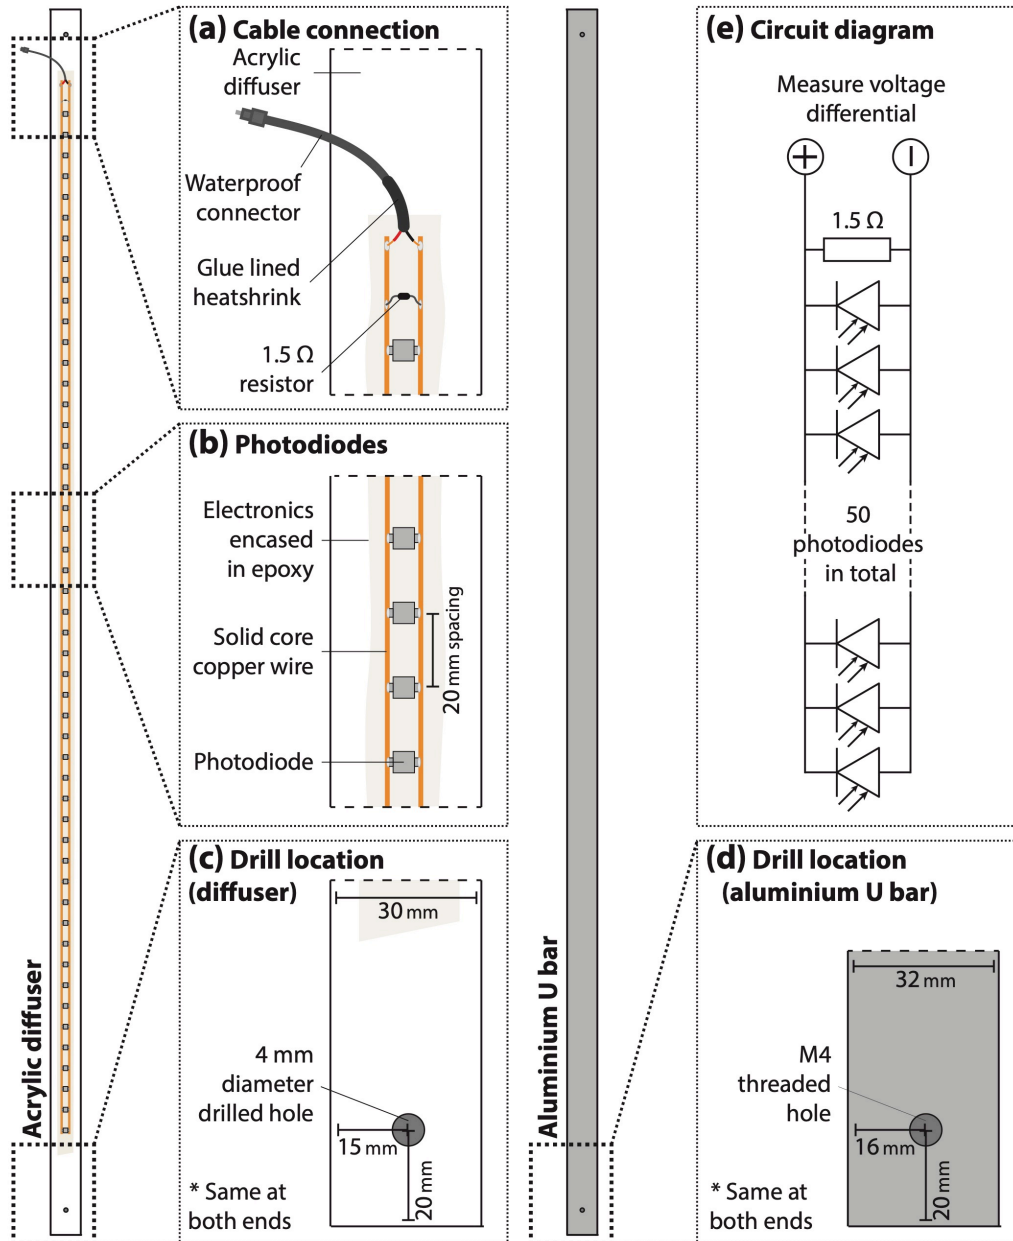

392

393 **Figure 2**

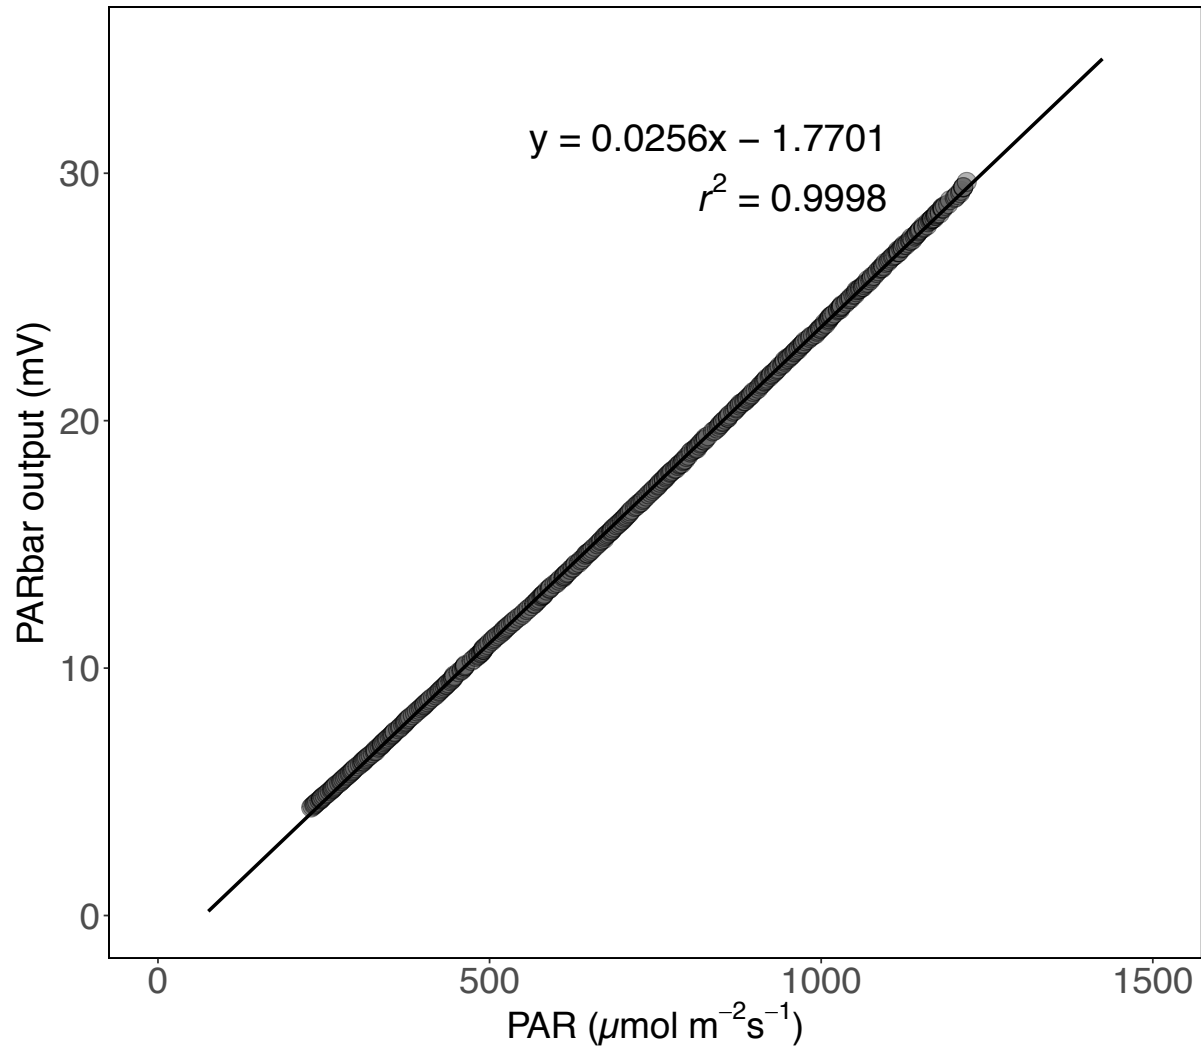

394  
395

396 **Figure 3**

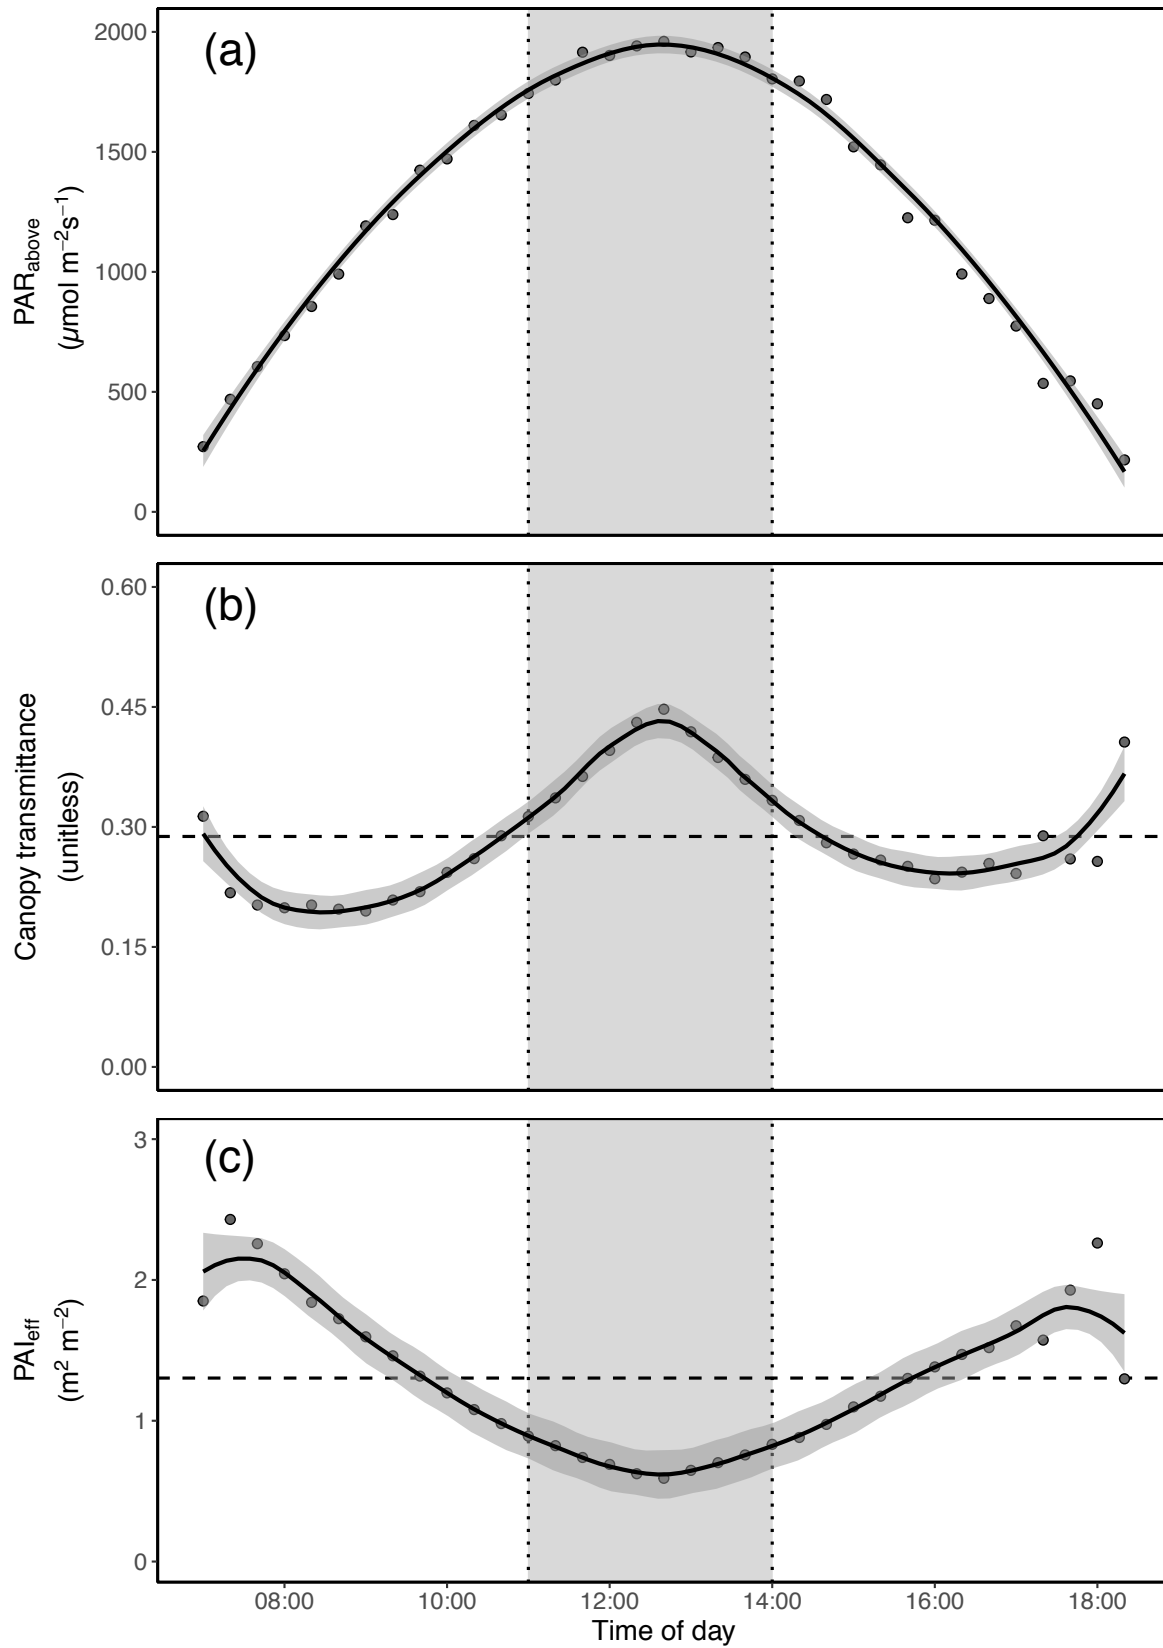

397  
398

399 **Figure 4**

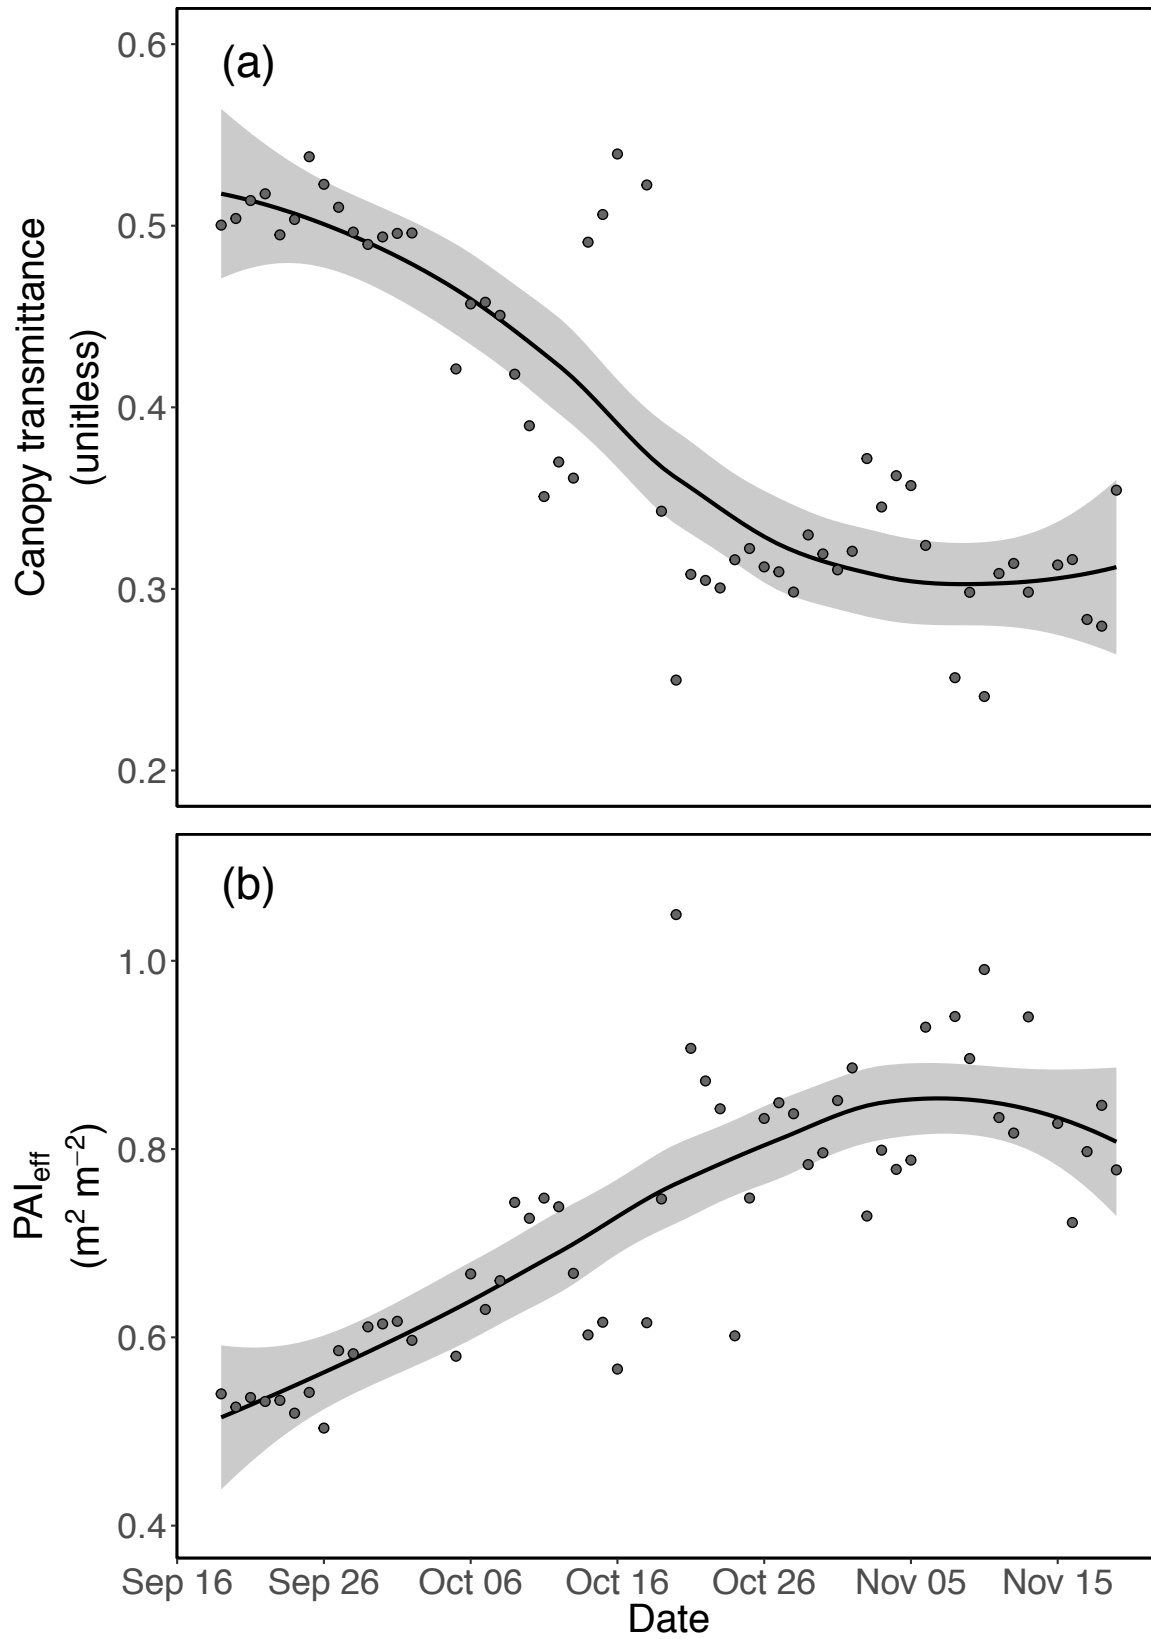

Source: https://www.biorxiv.org/content/10.1101/481218v1.full.pdf
